# Supplementary material for: A new {Cu3–Gd2} cluster as a two-in-one functional material with unique topology acting as a refrigerant and adsorbent for cationic dye
Source: Royal Society of Chemistry journal article supplement (doi:10.1039/d2ce00795a), 2022-01-01
Supplement: d2ce00795a1.pdf [file d2ce00795a1.pdf]

---

Supplementary Information

**A new {Cu<sub>3</sub>-Gd<sub>2</sub>} cluster as two-in-one functional material with unique topology acting as a refrigerant as well as adsorbent for cationic dye**

Khalil M. A. Qasem<sup>a†</sup>, Shabnam Khan<sup>a†</sup>, Magdalena Fitta<sup>b</sup>, Muhammad Nadeem Akhtar<sup>c</sup>, Murad A. AlDamen<sup>d</sup>, M. Shahid<sup>a\*</sup>, Hatem A. M. Saleh<sup>a</sup>, Musheer Ahmad<sup>e</sup>

---

<sup>a</sup>*Functional Inorganic Materials Lab (FIML), Department of Chemistry, Aligarh Muslim University, Aligarh 202002, India*

<sup>b</sup>*Institute of Nuclear Physics, Polish Academy of Sciences, 31-342 Kraków, Poland*

<sup>c</sup>*Department of Chemistry, Baghdad-ul-Jadeed Campus, The Islamia University of Bahawalpur, Bahawalpur 63100, Pakistan.*

<sup>d</sup>*Department of Chemistry, School of Science, the University of Jordan, Amman 11942, Jordan.*

<sup>e</sup>*Department of Applied Chemistry (ZHCET), Aligarh Muslim University, Aligarh 202002, India*

*\*Corresponding author, E-mail: shahid81chem@gmail.com*

†These authors contributed equally

**Table S1.** Crystal structure refinement data for {Cu<sub>3</sub>-Gd<sub>2</sub>}.

---

|                                             |                                                                                                |
|---------------------------------------------|------------------------------------------------------------------------------------------------|
| CCDC No.                                    | 2141839                                                                                        |
| Empirical formula                           | C <sub>34</sub> H <sub>70</sub> Cu <sub>3</sub> Gd <sub>2</sub> N <sub>4</sub> O <sub>27</sub> |
| Formula weight                              | 1472.09                                                                                        |
| Temperature/K                               | 100(2)                                                                                         |
| Crystal system                              | monoclinic                                                                                     |
| Space group                                 | P2 <sub>1</sub> /n                                                                             |
| a/Å                                         | 11.9919(4)                                                                                     |
| b/Å                                         | 18.7337(6)                                                                                     |
| c/Å                                         | 13.0670(4)                                                                                     |
| α/°                                         | 90                                                                                             |
| β/°                                         | 108.8720(10)                                                                                   |
| γ/°                                         | 90                                                                                             |
| Volume/Å <sup>3</sup>                       | 2777.73(15)                                                                                    |
| Z                                           | 2                                                                                              |
| ρ <sub>calc</sub> /cm <sup>3</sup>          | 1.7599                                                                                         |
| μ/mm <sup>-1</sup>                          | 3.566                                                                                          |
| F(000)                                      | 1469.2                                                                                         |
| Crystal size/mm <sup>3</sup>                | 0.33 × 0.23 × 0.16                                                                             |
| Radiation                                   | Mo Kα (λ = 0.71073)                                                                            |
| 2θ range for data collection/°              | 5.6 to 50.1                                                                                    |
| Index ranges                                | -15 ≤ h ≤ 15, -24 ≤ k ≤ 24, -17 ≤ l ≤ 17                                                       |
| Reflections collected                       | 43485                                                                                          |
| Independent reflections                     | 4918 [R <sub>int</sub> = 0.0593, R <sub>sigma</sub> = 0.0376]                                  |
| Data/restraints/parameters                  | 4918/0/343                                                                                     |
| Goodness-of-fit on F <sup>2</sup>           | 1.055                                                                                          |
| Final R indexes [I ≥ 2σ (I)]                | R <sub>1</sub> = 0.0246, wR <sub>2</sub> = 0.0591                                              |
| Final R indexes [all data]                  | R <sub>1</sub> = 0.0306, wR <sub>2</sub> = 0.0633                                              |
| Largest diff. peak/hole / e Å <sup>-3</sup> | 0.62/-0.61                                                                                     |

---

**Table S2.** Selected bond lengths (Å) for {Cu<sub>3</sub>-Gd<sub>2</sub>}.

| <i>Atom</i> | <i>Atom</i>      | <i>Length/Å</i> | <i>Atom</i> | <i>Atom</i> | <i>Length/Å</i> |
|-------------|------------------|-----------------|-------------|-------------|-----------------|
| Gd1         | Cu1              | 3.3037 (5)      | O3          | C4          | 1.417 (5)       |
| Gd1         | Cu2              | 3.41601 (19)    | O4          | C10         | 1.409 (4)       |
| Gd1         | O1               | 2.288 (2)       | O5          | C11         | 1.429 (4)       |
| Gd1         | O4 <sup>1</sup>  | 2.363 (2)       | O6          | C9          | 1.416 (5)       |
| Gd1         | O5               | 2.423 (2)       | O7          | C12         | 1.261 (5)       |
| Gd1         | O7               | 2.518 (3)       | O8          | C12         | 1.262 (5)       |
| Gd1         | O8               | 2.478 (3)       | O9          | C14         | 1.259 (5)       |
| Gd1         | O9               | 2.631 (3)       | O10         | C14         | 1.269 (5)       |
| Gd1         | O10              | 2.446 (3)       | O11         | C16         | 1.267 (5)       |
| Gd1         | O11              | 2.480 (3)       | O12         | C16         | 1.266 (5)       |
| Gd1         | O12              | 2.425 (3)       | N1          | C2          | 1.503 (5)       |
| Gd1         | C12              | 2.879 (4)       | N1          | C5          | 1.483 (5)       |
| Gd1         | C14              | 2.915 (4)       | N2          | C7          | 1.491 (5)       |
| Gd1         | C16              | 2.825 (4)       | N2          | C8          | 1.506 (4)       |
| Cu1         | Cu2 <sup>1</sup> | 2.8610 (4)      | C1          | C2          | 1.535 (5)       |
| Cu1         | O1               | 1.910 (3)       | C2          | C3          | 1.532 (5)       |
| Cu1         | O2               | 2.440 (3)       | C2          | C4          | 1.525 (5)       |
| Cu1         | O5               | 1.975 (2)       | C5          | C6          | 1.514 (5)       |
| Cu1         | N1               | 1.982 (3)       | C6          | C7          | 1.535 (5)       |
| Cu1         | N2               | 1.974 (3)       | C8          | C9          | 1.527 (5)       |
| Cu2         | O4 <sup>1</sup>  | 1.915 (2)       | C8          | C10         | 1.525 (5)       |
| Cu2         | O4               | 1.915 (2)       | C8          | C11         | 1.521 (5)       |
| Cu2         | O5               | 1.976 (2)       | C12         | C13         | 1.496 (5)       |
| Cu2         | O5 <sup>1</sup>  | 1.976 (2)       | C14         | C15         | 1.503 (6)       |
| O1          | C1               | 1.410 (4)       | C16         | C17         | 1.493 (6)       |
| O2          | C3               | 1.434 (4)       |             |             |                 |

**Table S3.** Selected bond angles for {Cu<sub>3</sub>-Gd<sub>2</sub>}.

| Atom            | Atom | Atom            | Angle/°    | Atom             | Atom | Atom             | Angle/°     |
|-----------------|------|-----------------|------------|------------------|------|------------------|-------------|
| Cu2             | Gd1  | Cu1             | 50.364 (8) | N1               | Cu1  | Cu2 <sup>1</sup> | 133.11 (9)  |
| O1              | Gd1  | Cu1             | 34.22 (6)  | N1               | Cu1  | O1               | 87.27 (12)  |
| O1              | Gd1  | Cu2             | 68.28 (6)  | N1               | Cu1  | O2               | 74.67 (11)  |
| O4 <sup>1</sup> | Gd1  | Cu1             | 78.19 (6)  | N1               | Cu1  | O5               | 173.75 (12) |
| O4 <sup>1</sup> | Gd1  | Cu2             | 32.70 (6)  | N2               | Cu1  | Gd1              | 128.08 (9)  |
| O4 <sup>1</sup> | Gd1  | O1              | 81.30 (9)  | N2               | Cu1  | Cu2 <sup>1</sup> | 96.47 (9)   |
| O5              | Gd1  | Cu1             | 36.41 (6)  | N2               | Cu1  | O1               | 167.52 (12) |
| O5              | Gd1  | Cu2             | 34.54 (6)  | N2               | Cu1  | O2               | 111.93 (11) |
| O5              | Gd1  | O1              | 69.22 (8)  | N2               | Cu1  | O5               | 86.49 (11)  |
| O5              | Gd1  | O4 <sup>1</sup> | 66.74 (8)  | N2               | Cu1  | N1               | 99.52 (13)  |
| O7              | Gd1  | Cu1             | 62.08 (6)  | Gd1 <sup>1</sup> | Cu2  | Gd1              | 180.0       |
| O7              | Gd1  | Cu2             | 105.50 (6) | Cu1 <sup>1</sup> | Cu2  | Gd1 <sup>1</sup> | 62.782 (9)  |
| O7              | Gd1  | O1              | 73.73 (9)  | Cu1              | Cu2  | Gd1              | 62.782 (9)  |
| O7              | Gd1  | O4 <sup>1</sup> | 137.92 (9) | Cu1 <sup>1</sup> | Cu2  | Gd1              | 117.218 (9) |
| O7              | Gd1  | O5              | 72.87 (8)  | Cu1              | Cu2  | Gd1 <sup>1</sup> | 117.218 (9) |
| O8              | Gd1  | Cu1             | 106.39 (6) | Cu1 <sup>1</sup> | Cu2  | Cu1              | 180.0       |
| O8              | Gd1  | Cu2             | 122.19 (7) | O4 <sup>1</sup>  | Cu2  | Gd1 <sup>1</sup> | 138.19 (7)  |
| O8              | Gd1  | O1              | 125.55 (9) | O4               | Cu2  | Gd1              | 138.19 (7)  |
| O8              | Gd1  | O4 <sup>1</sup> | 139.03 (9) | O4               | Cu2  | Gd1 <sup>1</sup> | 41.81 (7)   |
| O8              | Gd1  | O5              | 92.55 (9)  | O4 <sup>1</sup>  | Cu2  | Gd1              | 41.81 (7)   |
| O8              | Gd1  | O7              | 51.81 (9)  | O4 <sup>1</sup>  | Cu2  | Cu1 <sup>1</sup> | 82.40 (7)   |
| O9              | Gd1  | Cu1             | 116.75 (6) | O4               | Cu2  | Cu1              | 82.40 (7)   |
| O9              | Gd1  | Cu2             | 77.52 (6)  | O4 <sup>1</sup>  | Cu2  | Cu1              | 97.60 (7)   |
| O9              | Gd1  | O1              | 145.55 (9) | O4               | Cu2  | Cu1 <sup>1</sup> | 97.60 (7)   |
| O9              | Gd1  | O4 <sup>1</sup> | 71.76 (8)  | O4 <sup>1</sup>  | Cu2  | O4               | 180.0       |
| O9              | Gd1  | O5              | 80.43 (8)  | O5 <sup>1</sup>  | Cu2  | Gd1 <sup>1</sup> | 44.06 (7)   |
| O9              | Gd1  | O7              | 113.09 (9) | O5               | Cu2  | Gd1              | 44.06 (7)   |
| O9              | Gd1  | O8              | 70.08 (9)  | O5               | Cu2  | Gd1 <sup>1</sup> | 135.94 (7)  |
| O10             | Gd1  | Cu1             | 164.36 (6) | O5 <sup>1</sup>  | Cu2  | Gd1              | 135.94 (7)  |
| O10             | Gd1  | Cu2             | 114.09 (6) | O5               | Cu2  | Cu1 <sup>1</sup> | 136.41 (7)  |
| O10             | Gd1  | O1              | 150.22 (9) | O5 <sup>1</sup>  | Cu2  | Cu1              | 136.41 (7)  |
| O10             | Gd1  | O4 <sup>1</sup> | 87.74 (8)  | O5 <sup>1</sup>  | Cu2  | Cu1 <sup>1</sup> | 43.59 (7)   |
| O10             | Gd1  | O5              | 130.77 (8) | O5               | Cu2  | Cu1              | 43.59 (7)   |
| O10             | Gd1  | O7              | 129.17 (9) | O5 <sup>1</sup>  | Cu2  | O4 <sup>1</sup>  | 94.83 (10)  |
| O10             | Gd1  | O8              | 79.84 (9)  | O5 <sup>1</sup>  | Cu2  | O4               | 85.17 (10)  |
| O10             | Gd1  | O9              | 51.09 (9)  | O5               | Cu2  | O4 <sup>1</sup>  | 85.17 (10)  |
| O11             | Gd1  | Cu1             | 110.74 (6) | O5               | Cu2  | O4               | 94.83 (10)  |
| O11             | Gd1  | Cu2             | 109.07 (6) | O5 <sup>1</sup>  | Cu2  | O5               | 180.0       |

|     |     |                 |             |                  |     |                  |             |
|-----|-----|-----------------|-------------|------------------|-----|------------------|-------------|
| O11 | Gd1 | O1              | 77.35 (9)   | Cu1              | O1  | Gd1              | 103.44 (10) |
| O11 | Gd1 | O4 <sup>1</sup> | 83.79 (8)   | C1               | O1  | Gd1              | 144.4 (2)   |
| O11 | Gd1 | O5              | 137.84 (8)  | C1               | O1  | Cu1              | 110.8 (2)   |
| O11 | Gd1 | O7              | 121.62 (9)  | C3               | O2  | Cu1              | 103.7 (2)   |
| O11 | Gd1 | O8              | 128.37 (9)  | Cu2 <sup>1</sup> | O4  | Gd1 <sup>1</sup> | 105.49 (10) |
| O11 | Gd1 | O9              | 119.31 (9)  | C10              | O4  | Gd1 <sup>1</sup> | 119.5 (2)   |
| O11 | Gd1 | O10             | 73.97 (9)   | C10              | O4  | Cu2 <sup>1</sup> | 121.7 (2)   |
| O12 | Gd1 | Cu1             | 111.64 (7)  | Cu1              | O5  | Gd1              | 96.84 (9)   |
| O12 | Gd1 | Cu2             | 152.38 (6)  | Cu2              | O5  | Gd1              | 101.40 (10) |
| O12 | Gd1 | O1              | 85.95 (9)   | Cu2              | O5  | Cu1              | 92.80 (10)  |
| O12 | Gd1 | O4 <sup>1</sup> | 136.84 (9)  | C11              | O5  | Gd1              | 132.2 (2)   |
| O12 | Gd1 | O5              | 143.71 (9)  | C11              | O5  | Cu1              | 107.1 (2)   |
| O12 | Gd1 | O7              | 75.04 (9)   | C11              | O5  | Cu2              | 117.6 (2)   |
| O12 | Gd1 | O8              | 80.52 (9)   | C12              | O7  | Gd1              | 93.2 (2)    |
| O12 | Gd1 | O9              | 128.45 (9)  | C12              | O8  | Gd1              | 95.1 (2)    |
| O12 | Gd1 | O10             | 83.31 (9)   | C14              | O9  | Gd1              | 89.9 (2)    |
| O12 | Gd1 | O11             | 53.15 (9)   | C14              | O10 | Gd1              | 98.4 (2)    |
| C12 | Gd1 | Cu1             | 83.92 (8)   | C16              | O11 | Gd1              | 92.1 (2)    |
| C12 | Gd1 | Cu2             | 116.11 (8)  | C16              | O12 | Gd1              | 94.6 (2)    |
| C12 | Gd1 | O1              | 99.66 (10)  | C2               | N1  | Cu1              | 102.0 (2)   |
| C12 | Gd1 | O4 <sup>1</sup> | 146.01 (10) | C5               | N1  | Cu1              | 117.7 (2)   |
| C12 | Gd1 | O5              | 81.72 (10)  | C5               | N1  | C2               | 116.6 (3)   |
| C12 | Gd1 | O7              | 25.93 (10)  | C7               | N2  | Cu1              | 114.7 (2)   |
| C12 | Gd1 | O8              | 25.89 (10)  | C8               | N2  | Cu1              | 108.7 (2)   |
| C12 | Gd1 | O9              | 91.45 (10)  | C8               | N2  | C7               | 116.2 (3)   |
| C12 | Gd1 | O10             | 104.73 (10) | C2               | C1  | O1               | 109.8 (3)   |
| C12 | Gd1 | O11             | 129.84 (10) | C1               | C2  | N1               | 105.0 (3)   |
| C12 | Gd1 | O12             | 76.72 (10)  | C3               | C2  | N1               | 108.7 (3)   |
| C14 | Gd1 | Cu1             | 141.46 (8)  | C3               | C2  | C1               | 110.7 (3)   |
| C14 | Gd1 | Cu2             | 95.85 (8)   | C4               | C2  | N1               | 112.0 (3)   |
| C14 | Gd1 | O1              | 159.29 (10) | C4               | C2  | C1               | 110.2 (3)   |
| C14 | Gd1 | O4 <sup>1</sup> | 78.34 (10)  | C4               | C2  | C3               | 110.0 (3)   |
| C14 | Gd1 | O5              | 105.63 (10) | C2               | C3  | O2               | 110.9 (3)   |
| C14 | Gd1 | O7              | 124.99 (10) | C2               | C4  | O3               | 110.3 (3)   |
| C14 | Gd1 | O8              | 73.79 (10)  | C6               | C5  | N1               | 111.5 (3)   |
| C14 | Gd1 | O9              | 25.60 (10)  | C7               | C6  | C5               | 115.5 (3)   |
| C14 | Gd1 | O10             | 25.50 (10)  | C6               | C7  | N2               | 110.7 (3)   |
| C14 | Gd1 | O11             | 96.56 (10)  | C9               | C8  | N2               | 110.0 (3)   |
| C14 | Gd1 | O12             | 106.42 (10) | C10              | C8  | N2               | 112.7 (3)   |
| C14 | Gd1 | C12             | 99.35 (11)  | C10              | C8  | C9               | 107.7 (3)   |
| C16 | Gd1 | Cu1             | 114.25 (8)  | C11              | C8  | N2               | 105.0 (3)   |
| C16 | Gd1 | Cu2             | 132.94 (8)  | C11              | C8  | C9               | 109.8 (3)   |

|                  |     |                  |            |     |     |     |           |
|------------------|-----|------------------|------------|-----|-----|-----|-----------|
| C16              | Gd1 | O1               | 81.09(10)  | C11 | C8  | C10 | 111.6(3)  |
| C16              | Gd1 | O4 <sup>1</sup>  | 110.39(10) | C8  | C9  | O6  | 110.6(3)  |
| C16              | Gd1 | O5               | 150.30(9)  | C8  | C10 | O4  | 115.3(3)  |
| C16              | Gd1 | O7               | 98.71(10)  | C8  | C11 | O5  | 110.5(3)  |
| C16              | Gd1 | O8               | 104.55(10) | O7  | C12 | Gd1 | 60.9(2)   |
| C16              | Gd1 | O9               | 128.02(10) | O8  | C12 | Gd1 | 59.01(19) |
| C16              | Gd1 | O10              | 76.93(10)  | O8  | C12 | O7  | 119.9(4)  |
| C16              | Gd1 | O11              | 26.62(10)  | C13 | C12 | Gd1 | 178.5(3)  |
| C16              | Gd1 | O12              | 26.54(10)  | C13 | C12 | O7  | 120.2(4)  |
| C16              | Gd1 | C12              | 103.26(11) | C13 | C12 | O8  | 119.9(4)  |
| C16              | Gd1 | C14              | 102.42(11) | O9  | C14 | Gd1 | 64.5(2)   |
| Cu2 <sup>1</sup> | Cu1 | Gd1              | 66.855(9)  | O10 | C14 | Gd1 | 56.1(2)   |
| O1               | Cu1 | Gd1              | 42.34(7)   | O10 | C14 | O9  | 120.6(4)  |
| O1               | Cu1 | Cu2 <sup>1</sup> | 86.25(7)   | C15 | C14 | Gd1 | 174.0(3)  |
| O2               | Cu1 | Gd1              | 100.31(7)  | C15 | C14 | O9  | 120.9(4)  |
| O2               | Cu1 | Cu2 <sup>1</sup> | 58.47(6)   | C15 | C14 | O10 | 118.5(4)  |
| O2               | Cu1 | O1               | 79.88(10)  | O11 | C16 | Gd1 | 61.3(2)   |
| O5               | Cu1 | Gd1              | 46.75(7)   | O12 | C16 | Gd1 | 58.83(19) |
| O5               | Cu1 | Cu2 <sup>1</sup> | 43.61(7)   | O12 | C16 | O11 | 120.1(4)  |
| O5               | Cu1 | O1               | 87.14(10)  | C17 | C16 | Gd1 | 177.4(3)  |
| O5               | Cu1 | O2               | 101.58(9)  | C17 | C16 | O11 | 119.7(4)  |
| N1               | Cu1 | Gd1              | 128.40(10) | C17 | C16 | O12 | 120.2(4)  |

**Table S4. Atomic Occupancy for {Cu<sub>3</sub>-Gd<sub>2</sub>}.**

| <b>Atom</b> | <b>Occupancy</b> | <b>Atom</b> | <b>Occupancy</b> | <b>Atom</b> | <b>Occupancy</b> |
|-------------|------------------|-------------|------------------|-------------|------------------|
| O13         | 0.500000         | H13d        | 0.500000         | H13e        | 0.500000         |

**Table S5. Solvent masks information for {Cu<sub>3</sub>-Gd<sub>2</sub>}.**

| <b>Number</b> | <b>X</b> | <b>Y</b> | <b>Z</b> | <b>Volume</b> | <b>Electron count</b> | <b>Content</b> |
|---------------|----------|----------|----------|---------------|-----------------------|----------------|
| 1             | 0.000    | 0.000    | 0.500    | 159.7         | 21.1?                 |                |
| 2             | 0.500    | 0.500    | 1.000    | 159.7         | 21.1?                 |                |

**Table S6.** Parameters for different kinetic models for adsorption studies of MB and MO.

| Model     | Pseudo-first order             |                          |                          |       | Pseudo-second order                  |                          |                          |       | Intraparticle diffusion                |       |
|-----------|--------------------------------|--------------------------|--------------------------|-------|--------------------------------------|--------------------------|--------------------------|-------|----------------------------------------|-------|
|           | $K_1$<br>( $\text{min}^{-1}$ ) | $q_e$<br>(cal)<br>(mg/g) | $q_e$<br>(exp)<br>(mg/g) | $R^2$ | $k_2$<br>(g/mg)<br>$\text{min}^{-1}$ | $q_e$<br>(cal)<br>(mg/g) | $q_e$<br>(exp)<br>(mg/g) | $R^2$ | $K_3$<br>(mg/g)<br>$\text{min}^{-1/2}$ | $R^2$ |
| <b>MB</b> | 0.0027                         | 87.5                     | 93.6                     | 0.955 | 0.0084                               | 98.2                     | 93.6                     | 0.995 | 10.887                                 | 0.956 |
| <b>MO</b> | 0.0029                         | 65.13                    | 67.4                     | 0.899 | 0.008                                | 66.66                    | 67.4                     | 0.993 | 11.731                                 | 0.921 |

**Table S7.** Chemical structure and electrical property of dyes used

| Structure of dyes                                                                   | Dye | Molecular formula                                          | Molar mass (g/mol) | $\lambda_{\text{max}}$ (nm) | Electrical property |
|-------------------------------------------------------------------------------------|-----|------------------------------------------------------------|--------------------|-----------------------------|---------------------|
| 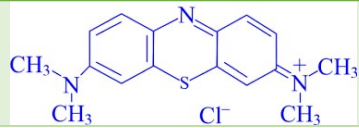 | MB  | $\text{C}_{16}\text{H}_{18}\text{ClN}_3\text{S}$           | 319.85             | 665                         | Cationic            |
|  | MO  | $\text{C}_{14}\text{H}_{14}\text{N}_3\text{NaO}_3\text{S}$ | 327.33             | 465                         | Anionic             |

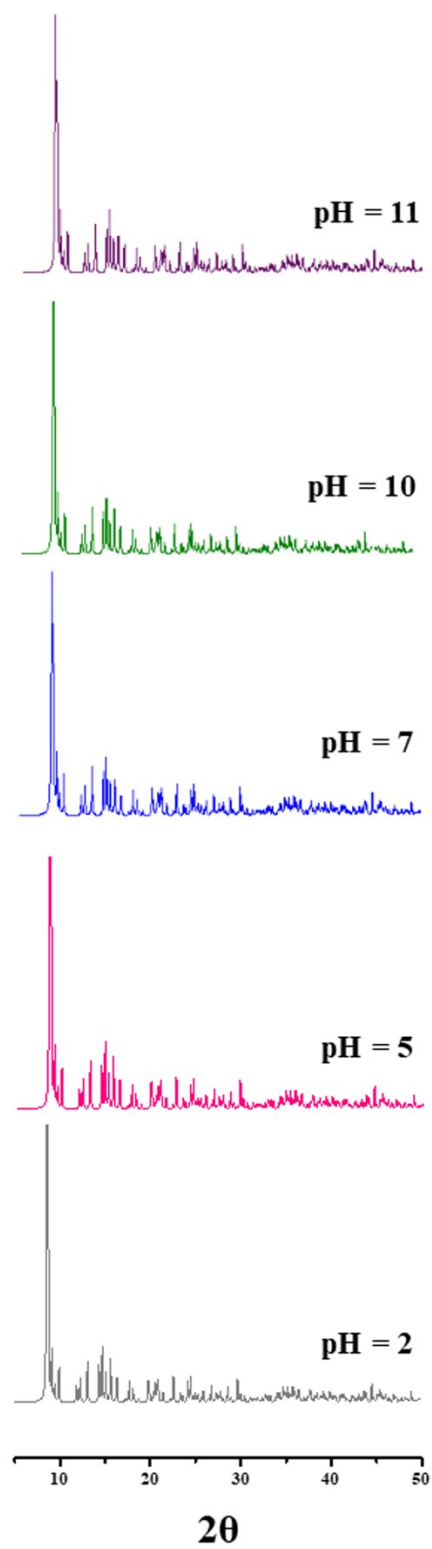

**Figure S1.** PXRD patterns of  $\{\text{Cu}_3\text{-Gd}_2\}@MB$  after dye adsorption at different pH.
